# Supplementary material
Source: PubMed Central journal article supplement (PMC5654635)
Supplement: NIHMS898187-supplement.pdf [file NIHMS898187-supplement.pdf]

A

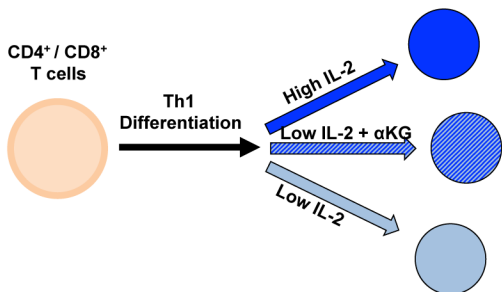

B

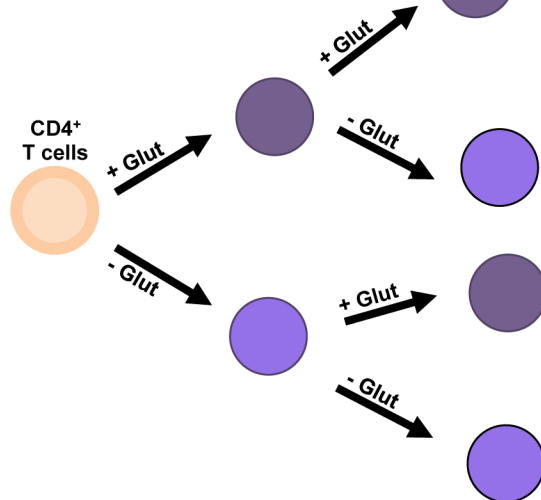

C

### High IL-2 / Low IL-2 GSEA Pathway Analysis

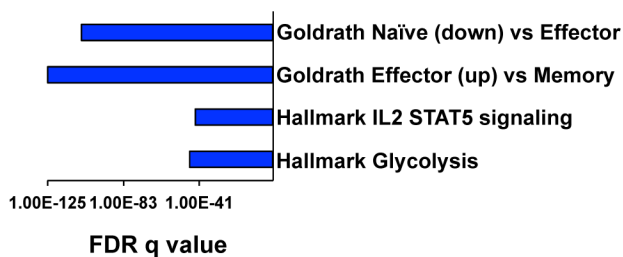

### Low IL-2 / High IL-2 GSEA Pathway Analysis

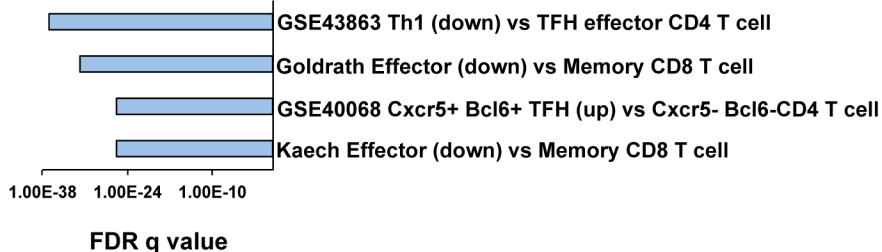

D

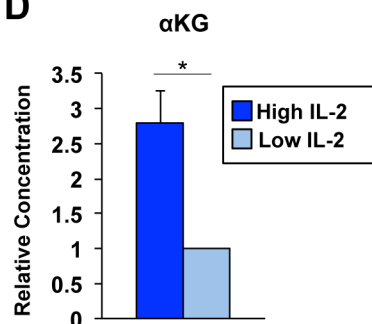

E

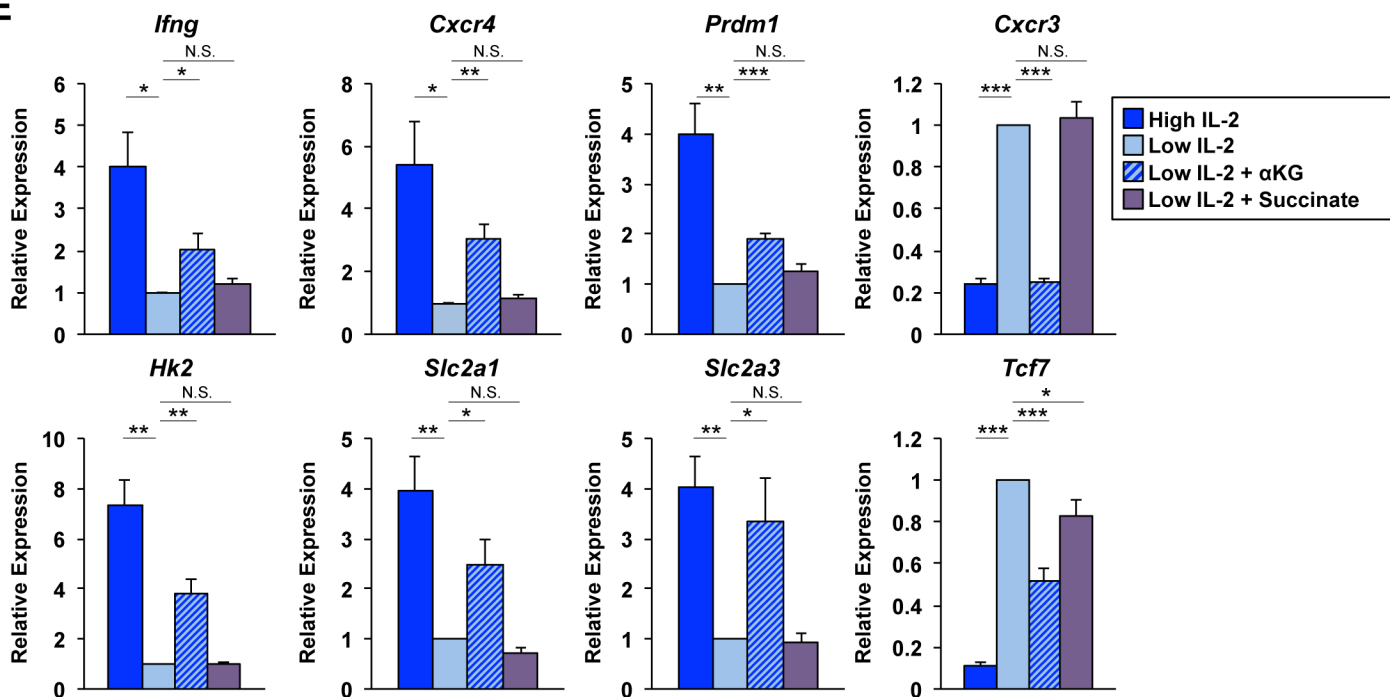

**Figure S1. Schematic representation of experimental systems approach. Related to Figures 1, 2.**

**(A)** Schematic depicting the *in vitro* primary CD4<sup>+</sup> and CD8<sup>+</sup> T cell differentiation culture system. Primary CD4<sup>+</sup> or CD8<sup>+</sup> T cells isolated from wild-type (WT) C57BL/6 mice were polarized in type 1 (IL-12 and anti-IL-4) conditions and then exposed to either high environmental IL-2 (100units/mL), low environmental IL-2 (2.5units/mL) or low IL-2 with  $\alpha$ KG conditions for two days. **(B)** Schematic depicting *in vitro* primary CD4<sup>+</sup> T cell differentiation examining glutamine sensitivity. Primary CD4<sup>+</sup> T cells were isolated from WT C57BL/6 mice and were stimulated with  $\alpha$ CD3 and  $\alpha$ CD28 in Th1 polarizing conditions either with glutamine (dark purple) or without glutamine (light purple). After 3 days, the cells were split and maintained in Th1 polarizing conditions either with glutamine (dark purple) or without glutamine (light purple) and either high IL-2 or low IL-2 conditions for two days. **(C)** FDR q values from a gene set enrichment analysis (GSEA) on genes that were induced in CD4<sup>+</sup> Th1 cells in high environmental IL-2 relative to low IL-2 conditions (dark blue) or genes that were more highly expressed in low IL-2 relative to high IL-2 conditions (light blue) in RNA-seq experiments. Differential gene expression was determined by a Cuffdiff analysis and genes analyzed by GSEA had at least a 2-fold statistically significant difference between conditions and an FPKM value of 1 or greater for the expression of the gene in at least one of the comparison conditions. The n= three independent biological replicates for the RNA-seq. **(D)** WT CD4<sup>+</sup> Th1 cells were cultured in either high IL-2 (250units/mL) or low IL-2 (10units/mL) conditions and  $\alpha$ KG levels were monitored. The graph represents the relative comparison of the  $\alpha$ KG levels found in the low IL-2 relative to the high IL-2 condition from n= three independent experiments. **(E)** Primary WT CD4<sup>+</sup> T cells polarized in Th1 conditions were exposed to high IL-2 (dark blue), low IL-2 (light blue), low IL-2 with cell permeable  $\alpha$ KG (blue hatched) or low IL-2 with cell permeable succinate (purple) and analyzed by qRT-PCR. Each sample was first normalized to the *Rps18* control and then compared relative to the low IL-2 condition for each independent experiment. The n= at least three independent experiments for each gene in the analysis. Error bars represent SEM and an unpaired student t-test was performed. P values are indicated above each comparison by asterisks (NS not significant, \*  $\leq$ 0.05, \*\* $\leq$ 0.01, and \*\*\* $\leq$ 0.001).

A

CD4<sup>+</sup> Th1 cells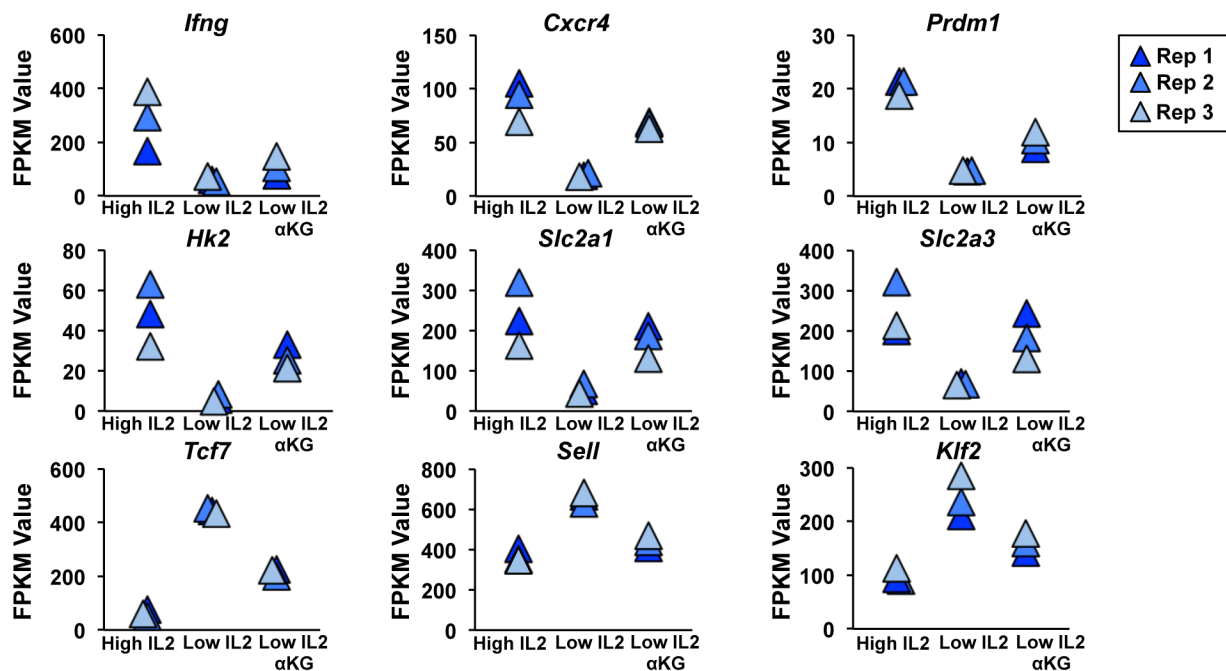

B

CD8<sup>+</sup> Tc1 cells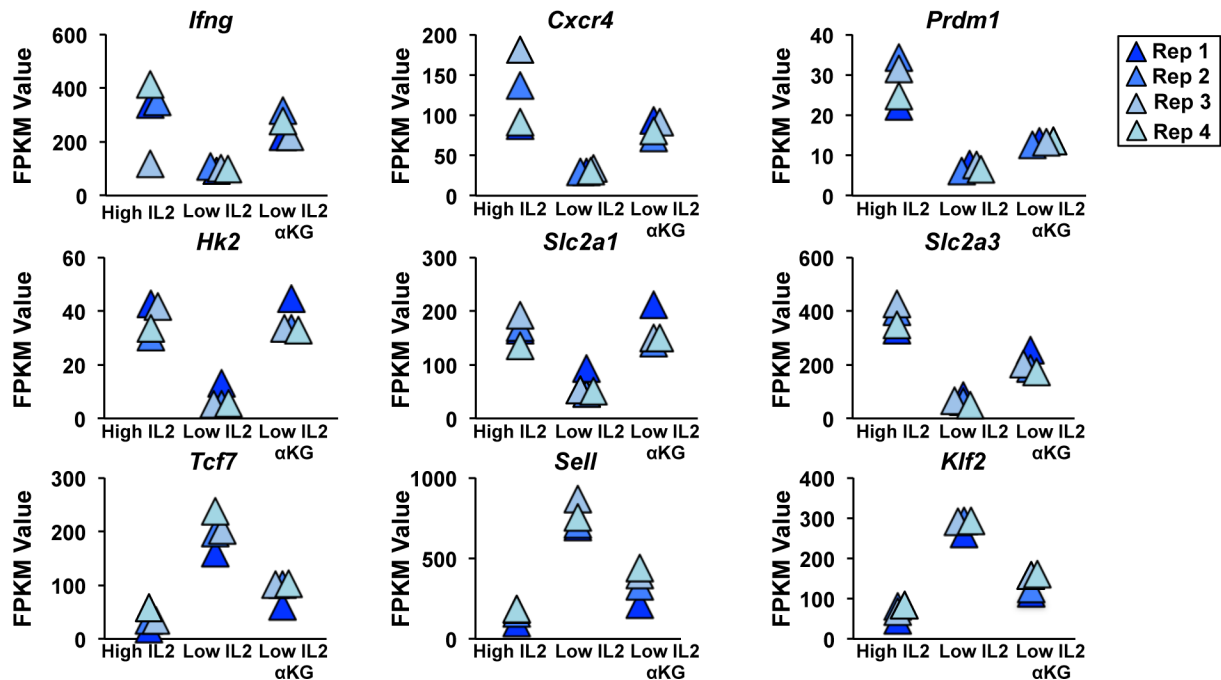

C

CD4<sup>+</sup> Th1 cells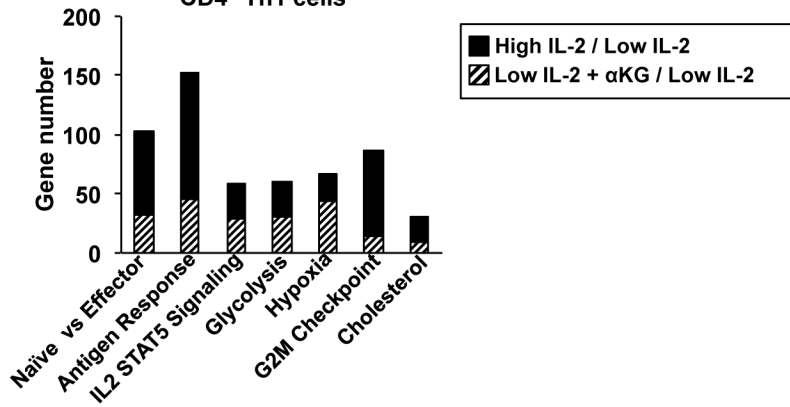CD8<sup>+</sup> Tc1 cells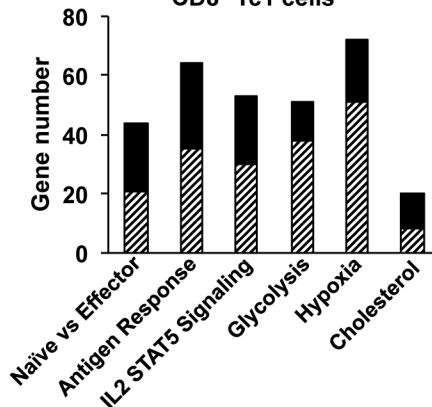

**Figure S2. IL-2- and  $\alpha$ KG-sensitive gene expression in CD4<sup>+</sup> Th1 and CD8<sup>+</sup> Tc1 cells from RNA-seq. Related to Figures 1, 2. (A, B) Primary (A) CD4<sup>+</sup> or (B) CD8<sup>+</sup> T cells polarized in type 1 conditions were exposed to high IL-2, low IL-2, or low IL-2 with  $\alpha$ KG and RNA-seq analyses were performed on (A) three or (B) four biological replicates. Graphs represent the FPKM values for the indicated genes for each of the conditions. (C) GSEA was performed as described in Figure 2C and 2D. Graphs representing the number of genes in the pathways enriched by high IL-2 in comparison to low IL-2 (black bars) and low IL-2 with  $\alpha$ KG in comparison to low IL-2 (black hatched bars) in CD4<sup>+</sup> T cells (left) or CD8<sup>+</sup> T cells (right).**



Figure S3

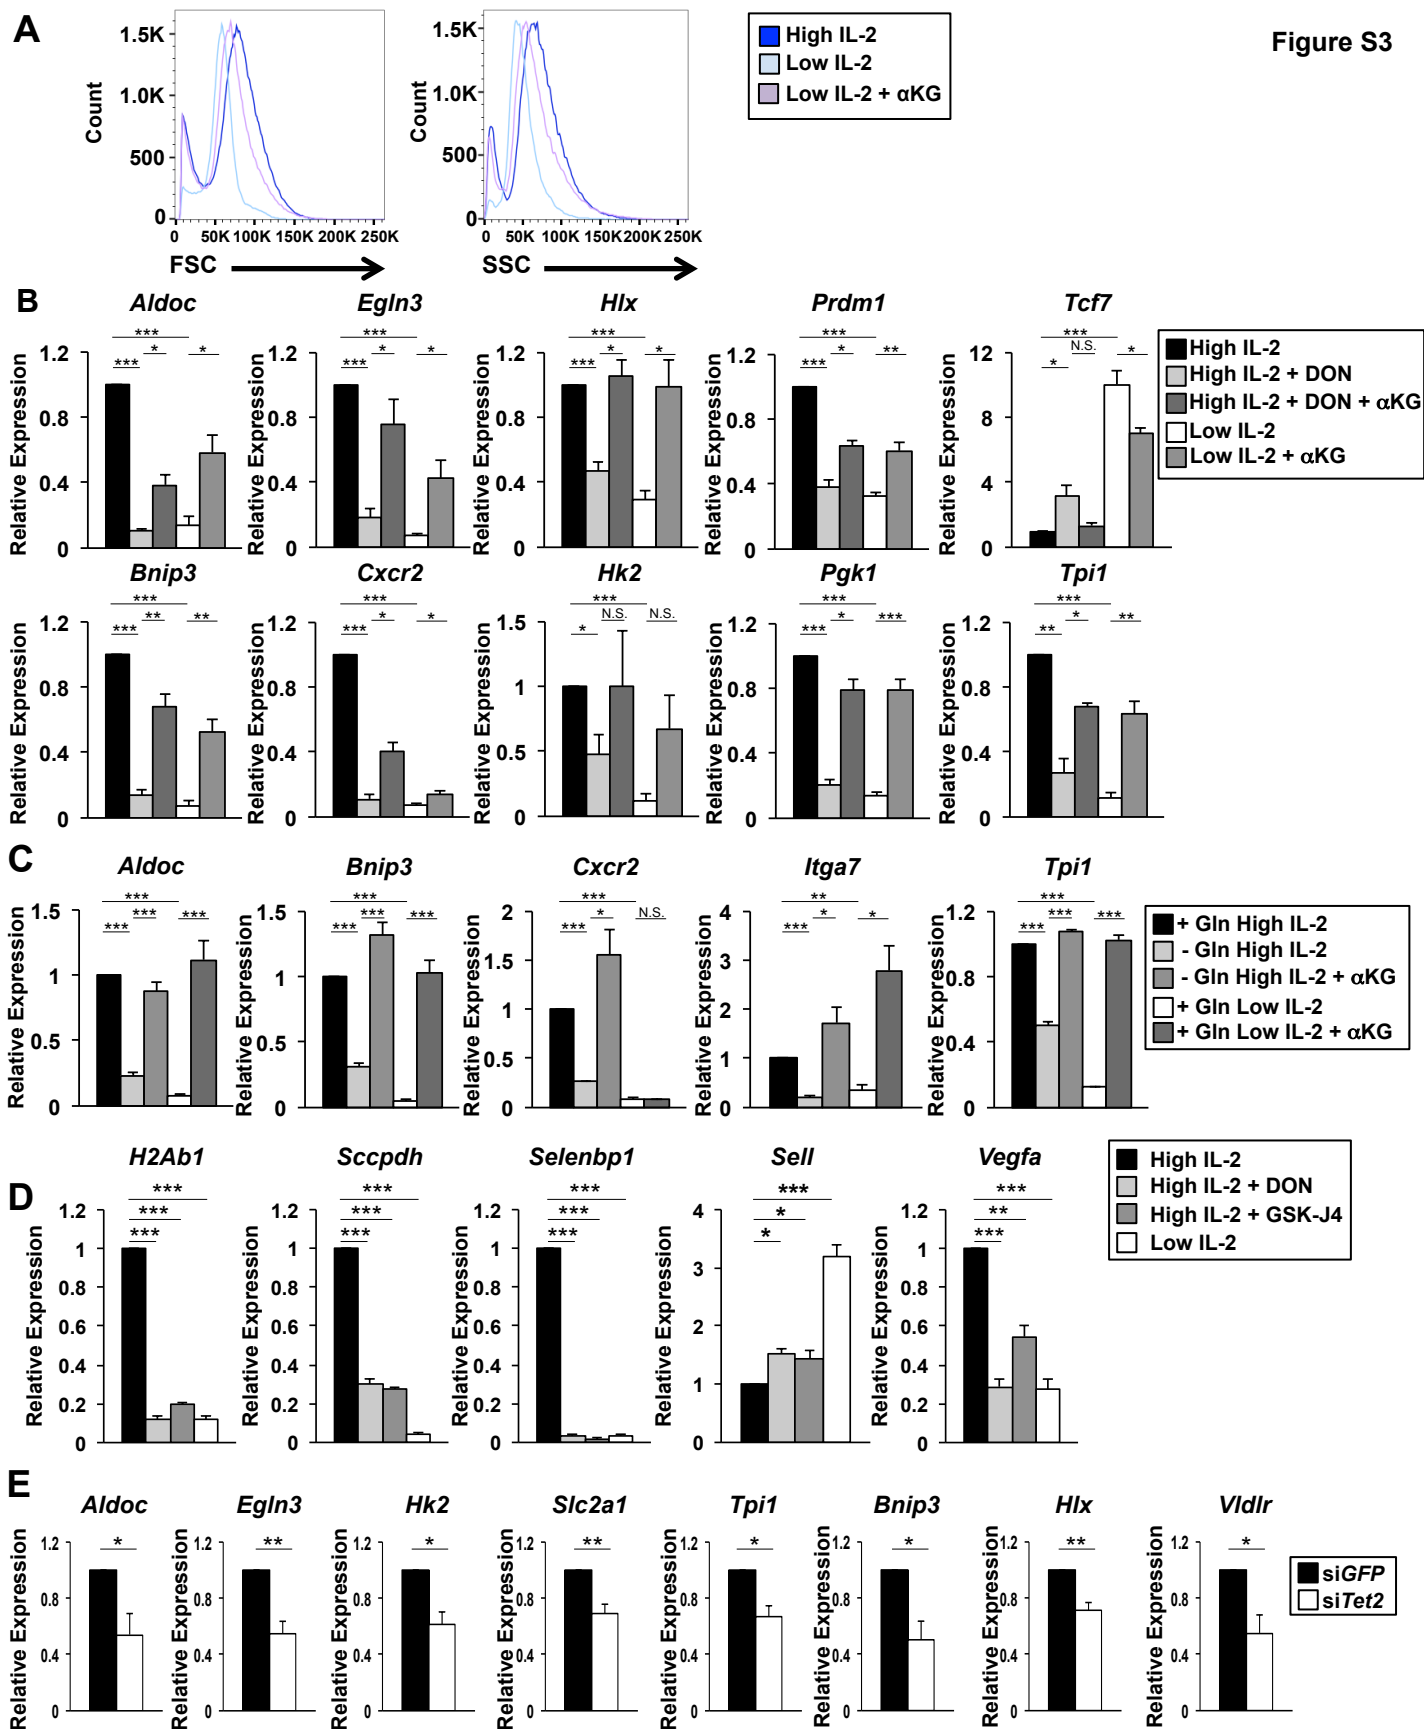

**Figure S3. Gln- and  $\alpha$ KG-sensitive events contribute to IL-2-sensitive gene expression in CD4<sup>+</sup> Th1 cells. Related to Figures 1-3.** (A) Flow cytometry analysis of forward scatter and side scatter for primary CD4<sup>+</sup> T cells polarized in Th1 conditions and exposed to high IL-2 (dark blue), low IL-2 (light blue), or low IL-2 with  $\alpha$ KG (purple) from the same samples described in Figure 1C. Data are representative of three independent biological replicate experiments. (B) Primary CD4<sup>+</sup> T cells polarized in Th1 conditions were maintained in high IL-2 or low IL-2 conditions. Th1 cells maintained in high IL-2 conditions were left untreated (black bar), or were treated with DON (light grey) or DON with  $\alpha$ KG (dark grey bar). Th1 cells maintained in low IL-2 were left either untreated (white bar) or treated with  $\alpha$ KG (medium grey bar). Transcripts were monitored by qRT-PCR and samples were first normalized to the *Rps18* control and then compared relative to the high IL-2 condition for each independent experiment. (C) Experiment with primary CD4<sup>+</sup> T cells as described in Figure 2F. (D) Experiment with primary CD4<sup>+</sup> T cells as described in Figure 3C. (E) Primary CD4<sup>+</sup> T cells polarized in Th1 conditions were transfected with either a control siRNA to *GFP* (black bars) or an siRNA to *Tet2* (white bars). Transcripts were monitored by qRT-PCR and samples were first normalized to the *Rps18* control and then compared relative to the si*GFP* control for each independent experiment. The control siRNA sample is the same as the one used for *Ctcf* siRNA experiments described in Figure 4D and S4B. (B-E) Error bars represent SEM and an unpaired student t-test was performed. (B-D) P values are indicated above each comparison by asterisks (\*  $\leq 0.05$ , \*\*  $\leq 0.001$ , and \*\*\*  $\leq 0.0001$ ). (E) P values are indicated above each comparison by asterisks (\*  $\leq 0.05$  and \*\*  $\leq 0.01$ ). The n= at least (B) 4 except DON with  $\alpha$ KG is at least 3 (D) 4 except high IL-2 with DON n= 3 or (C, E) 3 independent biological replicates for each gene analyzed.

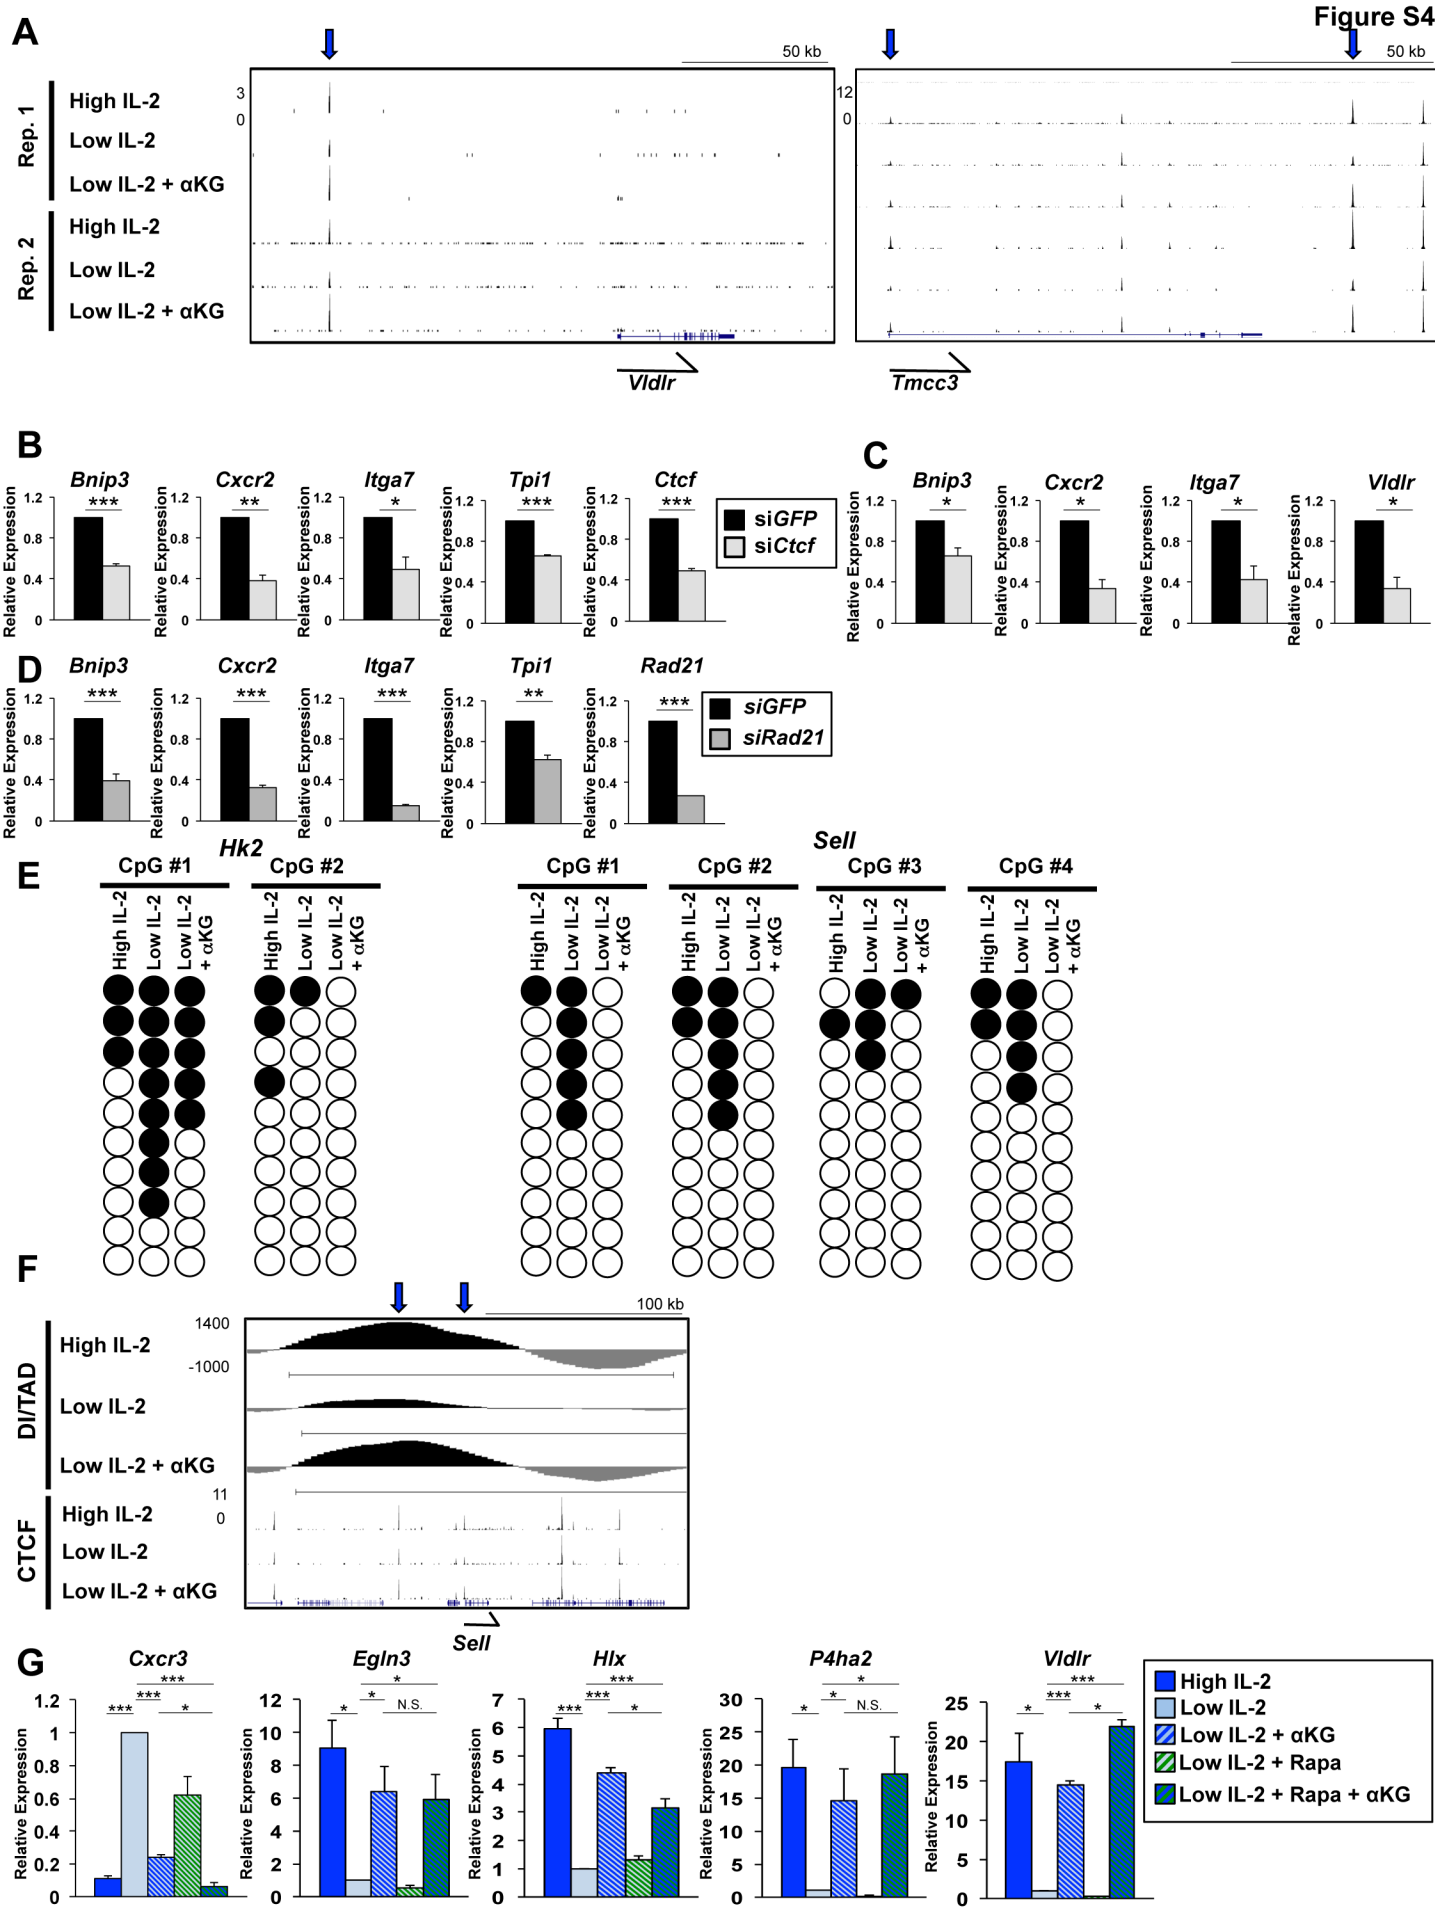

**Figure S4: IL-2- and  $\alpha$ KG-sensitive CTCF association regulates a portion of the IL-2-sensitive program. Related to Figures 4, 6. (A)** UCSC genome browser tracks displaying two independent CTCF ChIP-seq replicates for primary CD4<sup>+</sup> T cells polarized in Th1 cell conditions and maintained in high IL-2, low IL-2, or low IL-2 with  $\alpha$ KG as described in Figure 4. **(B)** Experiments were performed as described in Figure 4D. The control siRNA sample is the same as the one used for *Tet2* siRNA experiments described in Figure S3E. The *Ctcf* or *Rad21* knockdown was monitored in cells transfected with siRNA at the time of initial TCR stimulation and at the split day. **(C)** Primary CD8<sup>+</sup> T cells were polarized under type 1 conditions and cells were exposed to either an siRNA to *Ctcf* or an siRNA to *GFP* as a control. Experiments were analyzed as described in Figure 4D. **(D)** Experiments and analyses were performed as described in Figure 4E. **(E)** Independent biological replicates for bisulfite sequencing analysis of *Hk2* and *Sell* as described in Figure 6B-C. **(F)** UCSC genome browser track for *Sell* locus displaying CTCF ChIP-seq peaks and in situ Hi-C analysis of the directionality index from experiments in CD4<sup>+</sup> Th1 cells exposed to high IL-2, low IL-2, or low IL-2 with  $\alpha$ KG displayed as in Figure 4C and S5B. **(G)** Primary Th1 cells were exposed to high IL-2 (dark blue bars), low IL-2 (light blue bars), low IL-2 with  $\alpha$ KG (dark blue/light blue hatched bars), low IL-2 with rapamycin (green/light blue hatched bars), or low IL-2 with  $\alpha$ KG and rapamycin (green/dark blue hatched bars). **(B-D, G)** Error bars represent SEM and an unpaired student t-test was performed. P values are indicated above each comparison by asterisks (\*  $\leq 0.05$ , \*\*  $\leq 0.001$ , and \*\*\*  $\leq 0.0001$ ). The n= at least **(B, G)** 3 or **(C)** 2 independent experiments for each gene analyzed. For **(D)**, the n= at least 3 independent biological replicates for all genes except *Rad21* was 2 independent biological replicates.

Figure S5

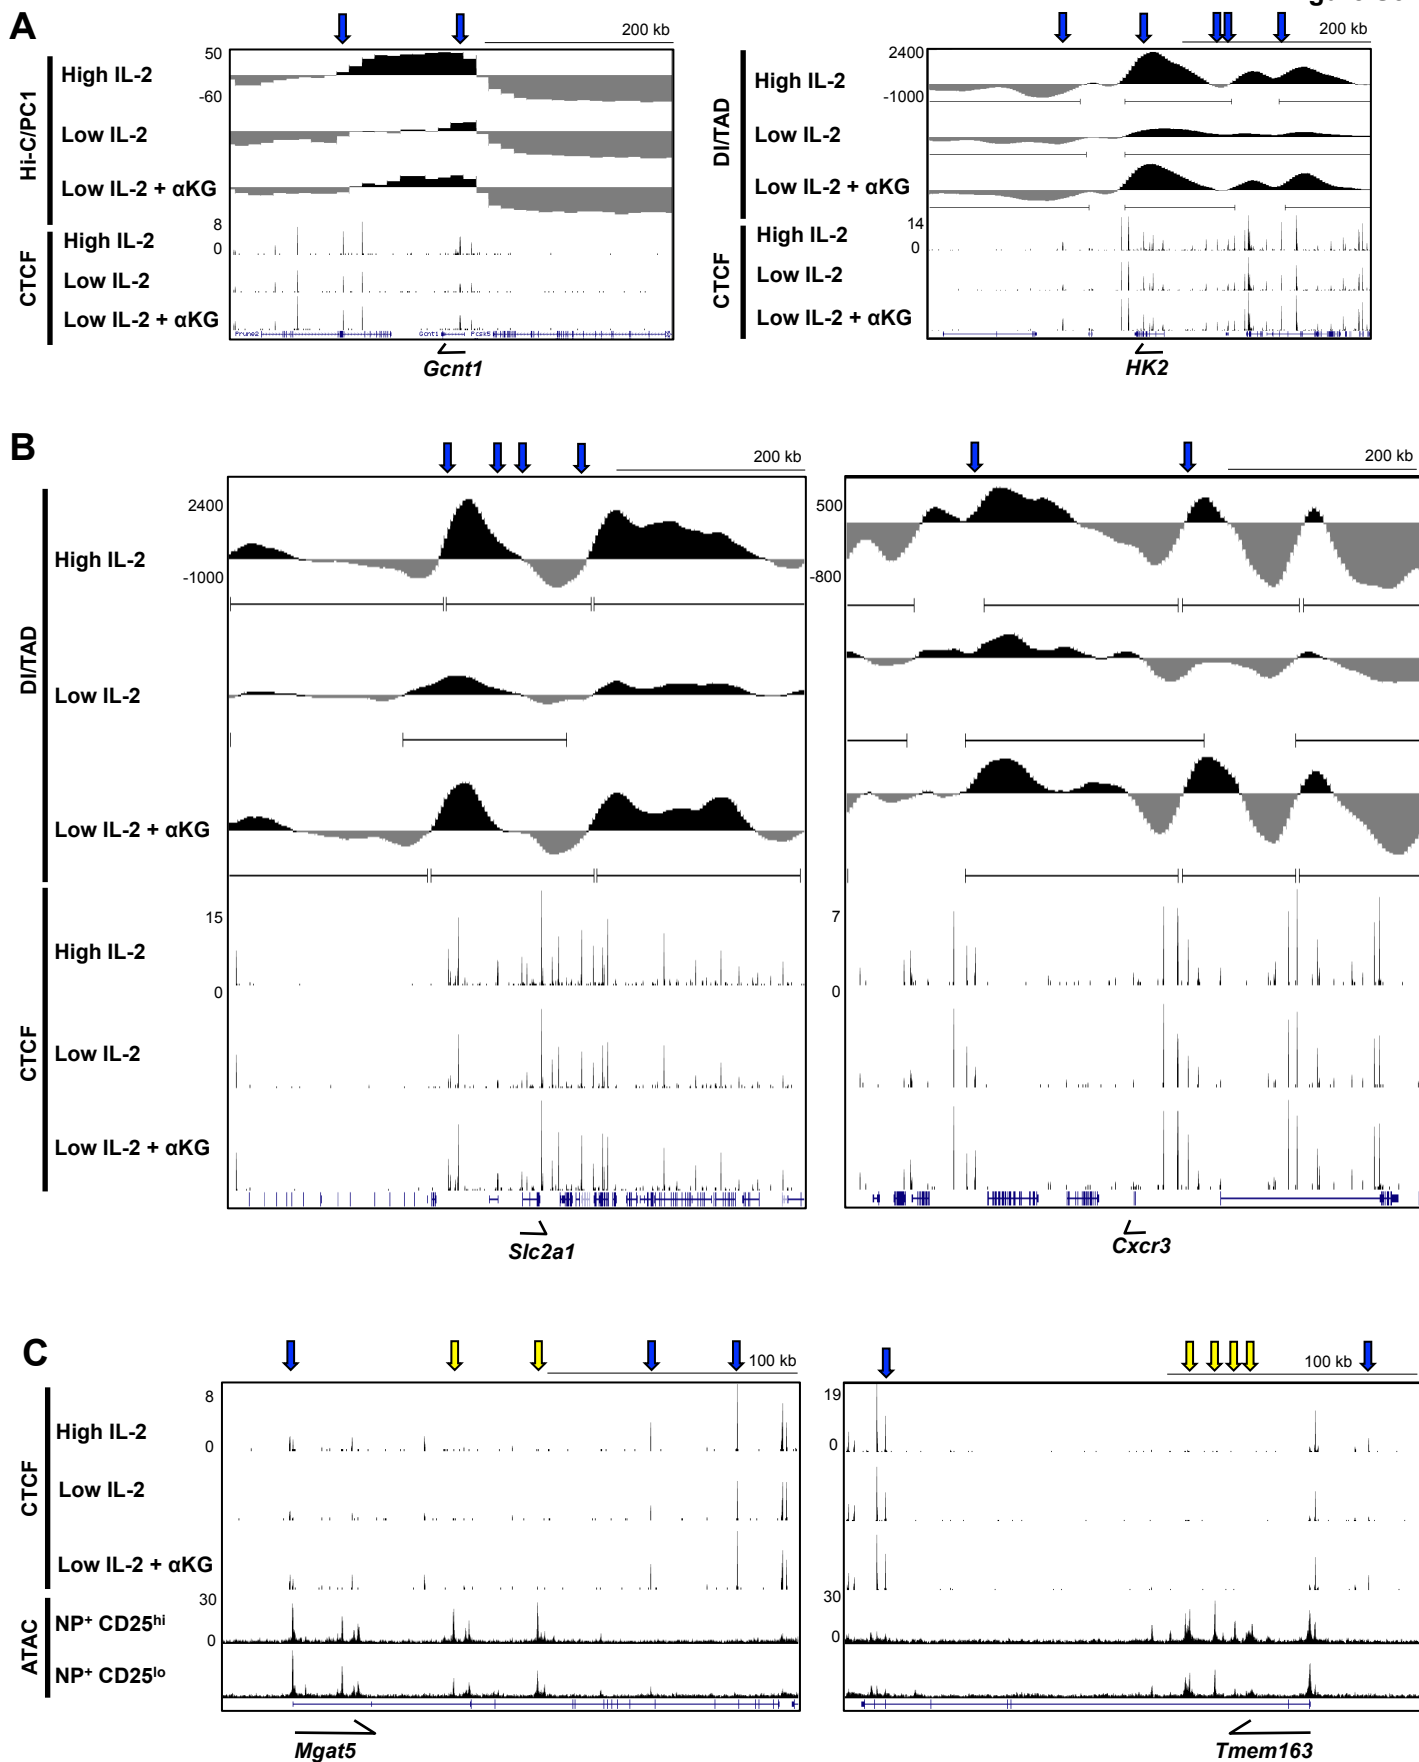

**Figure S5. IL-2- and  $\alpha$ KG-sensitive CTCF association and genome topology in CD4<sup>+</sup> Th1 cells. Related to Figures 4, 5. (A, B)** UCSC genome browser tracks displaying Hi-C PC1 analysis, directionality index, TAD boundary analysis, and CTCF ChIP-seq analysis for CD4<sup>+</sup> T cells polarized in Th1 conditions and maintained in either high IL-2, low IL-2, or low IL-2 with  $\alpha$ KG. **(C)** ATAC-seq analysis from NP antigen specific CD8<sup>+</sup> T cells isolated 9 days after influenza infection. NP antigen specific cells were sorted into CD25<sup>hi</sup> or CD25<sup>lo</sup> populations for ATAC-seq analysis. Genomic regions displayed were found to have a higher probability of interaction in high IL-2 or low IL-2 with  $\alpha$ KG compared to low IL-2 in the circos analysis in Figure 5D.

Figure S6

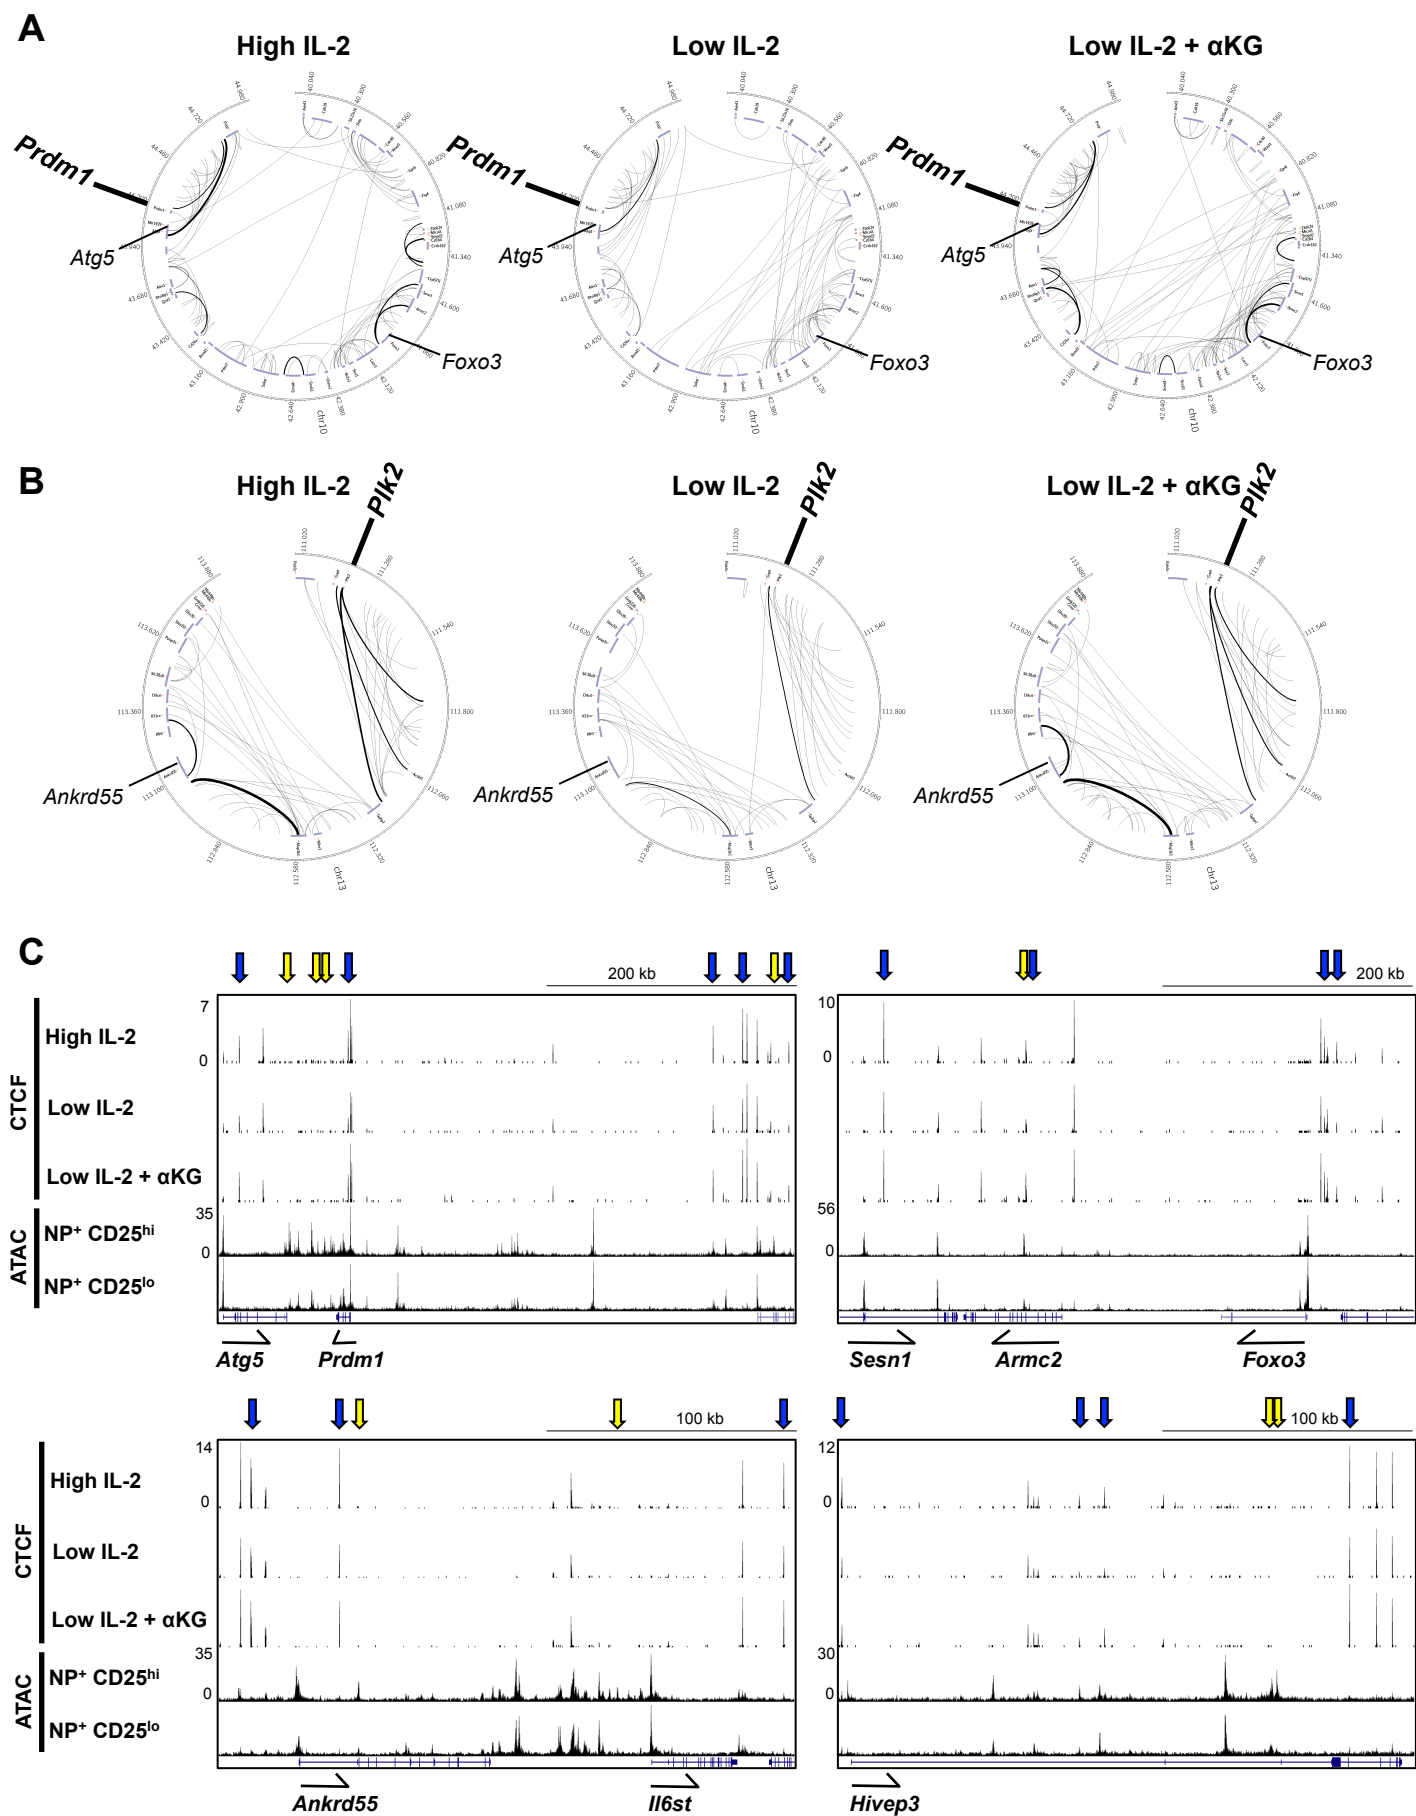

**Figure S6. IL-2- and  $\alpha$ KG-sensitive genomic interactions in CD4<sup>+</sup> T cells. Related to Figure 5. (A-C) (A, B) Circos plots displaying Hi-C interaction data for genomic regions surrounding *Prdm1* (Chr10:40,000,000-45,000,000) or *Plk2* (Chr13:111,020,000-113,880,000) or (C) UCSC genome browser tracks displaying CTCF ChIP-seq analysis from primary CD4<sup>+</sup> T cells polarized in Th1 conditions and maintained in either high IL-2, low IL-2, or low IL-2 with  $\alpha$ KG. (A, B) Analysis was performed as stated in Figure 5C, 5D. (C) ATAC-seq analysis from NP antigen specific CD8<sup>+</sup> T cells as described in S5C. Genomic regions displayed were found to have a higher probability of interaction in high IL-2 or low IL-2 with  $\alpha$ KG compared to low IL-2 in circos analyses.**





**Figure S7. CTCF and H3K27Ac ChIP-seq tracks surrounding genes that are expressed in either Th1 or ES cells. Related to Figure 7. (A, B)** UCSC genome browser tracks displaying CTCF and H3K27Ac ChIP-seq peaks from primary CD4<sup>+</sup> T cells polarized in Th1 conditions and exposed to high IL-2, low IL-2, or low IL-2 with  $\alpha$ KG. The locations of genes in each track are shown at the bottom of each panel. **(C)** Graphs display the FPKM values from the RNA-seq analyses performed with CD4<sup>+</sup> Th1 cells (as described in Figure S2 and Figure 7C), E14Tg2a cells (as described in Figure 7C), and CD8<sup>+</sup> Tc1 cells (as described in Figure S2 and Figure 7C).

| REAGENT or RESOURCE | SOURCE   | IDENTIFIER                   |
|---------------------|----------|------------------------------|
| Oligonucleotides    |          |                              |
| Egln3-forward       | Eurofins | TGGTCAGACCGCA<br>GGAATCCAC   |
| Egln3-reverse       | Eurofins | GCGGATTGCACAC<br>CACAGTCAG   |
| Tcf7-forward        | Eurofins | GATGCTGGGATCT<br>GGTGAC      |
| Tcf7-reverse        | Eurofins | CTCCTTGAGTGTG<br>CACTCAG     |
| Cxcr3-forward       | Eurofins | CAGCCAAGCCATG<br>TACCTTG     |
| Cxcr3-reverse       | Eurofins | CATAATCGTAGGG<br>AGAGGTG     |
| Klf2-forward        | Eurofins | GCAAGACCTACAC<br>CAAGAGC     |
| Klf2-reverse        | Eurofins | CTGTGACCTGTGT<br>GCTTTTCG    |
| Hlx-forward         | Eurofins | GCCTGGAGAAGA<br>GGTTTGAG     |
| Hlx-reverse         | Eurofins | CACTTCATCCTCC<br>GTTTCTG     |
| Bnip3-forward       | Eurofins | CGAAGCGCACAG<br>CTACTCTCAGC  |
| Bnip3-reverse       | Eurofins | GCTAGTGGAAAGTT<br>GTCAGACGCC |
| P4ha2-forward       | Eurofins | TGACTTCTCAAGG<br>AGCGATGAGC  |
| P4ha2-reverse       | Eurofins | TGGCACCACCAGC<br>TTCGACATC   |
| Ndrp1-forward       | Eurofins | CAACGTGGAGGTA<br>GTGCACAC    |
| Ndrp1-reverse       | Eurofins | CTCCAACCTACCAG<br>CAGAGC     |

|                |          |                              |
|----------------|----------|------------------------------|
| Vldlr-forward  | Eurofins | GTGACCACAGCAG<br>TATCAGAAG   |
| Vldlr-reverse  | Eurofins | CCACCTACTGCTG<br>CCATCAC     |
| Sell-forward   | Eurofins | GGCATTCTCATT<br>GGCTGG       |
| Sell-reverse   | Eurofins | ATGTGGGAGATGC<br>CTGCGTG     |
| Pgk1-forward   | Eurofins | CCTTGCCTGTTGA<br>CTTTGTC     |
| Pgk1-reverse   | Eurofins | GACCATTCCAAAC<br>AATCTGC     |
| Slc2a3-forward | Eurofins | TGGCTGGCTGTTG<br>TAACTGGAC   |
| Slc2a3-reverse | Eurofins | GAAGATGAGGAAG<br>GCAGCGAAG   |
| Aldoc-forward  | Eurofins | GCTATGCCAGCAT<br>CTGCCAG     |
| Aldoc-reverse  | Eurofins | GAGCAGAGTCCCT<br>TCGAGG      |
| Cxcr2-forward  | Eurofins | GCTCACAAACAGC<br>GTCGTAG     |
| Cxcr2-reverse  | Eurofins | GCATCTGGCAGAA<br>TAGAGGG     |
| Tpi1-forward   | Eurofins | AAGCCGGCATCAC<br>CGAGAAG     |
| Tpi1-reverse   | Eurofins | CACACAGGTTTCAT<br>AGGCCAGGAC |
| Itga7-forward  | Eurofins | CTGGAACAGCACC<br>TTTCTG      |
| Itga7-reverse  | Eurofins | GTCCAAGTACACC<br>ATCACTG     |
| Sccpdh-forward | Eurofins | CGAATCTGCACTC<br>AAGTGAAG    |
| Sccpdh-reverse | Eurofins | GGAGAAAGCTGCT<br>CCAGGTG     |

|                          |          |                                            |
|--------------------------|----------|--------------------------------------------|
| Selenbp1-forward         | Eurofins | CTCAGATGATCCA<br>GCTCAGC                   |
| Selenbp1-reverse         | Eurofins | CAAAGTCCACCAG<br>AAAGTTGG                  |
| Vegfa-forward            | Eurofins | GGCTGCTGTAACG<br>ATGAAGC                   |
| Vegfa-reverse            | Eurofins | CACATCTGCTGTG<br>CTGTAGG                   |
| H2Ab1-forward            | Eurofins | GAGAGGTCTACAC<br>CTGTACAC                  |
| H2Ab1-reverse            | Eurofins | CGAGGAAGATCAC<br>CCCAAGC                   |
| Ctcf-forward             | Eurofins | CACAATGGCAAGA<br>CATGCAG                   |
| Ctcf-reverse             | Eurofins | CTCCTCATTGTCA<br>TCGAGATC                  |
| Rad21-forward            | Eurofins | GGAGGATGAAGAT<br>GCTTCAG                   |
| Rad21-reverse            | Eurofins | CGGTTTGTGTTTC<br>GACACAG                   |
| Rps18-forward            | Eurofins | GGAGAACTCACGG<br>AGGATGAG                  |
| Rps18-reverse            | Eurofins | CGCAGCTTGTTGT<br>CTAGACCG                  |
| Sell-forward (Bisulfite) | Eurofins | TTTTTTAAGTTAGA<br>GTTTTGGGATTTTA<br>TTTAGG |
| Sell-reverse (Bisulfite) | Eurofins | CGTCCCTTCCCTT<br>CCCTACCCTTCC              |
| Hk2-forward (Bisulfite)  | Eurofins | TAGAGTTTTTTAGA<br>ATTTTTGTTTGT<br>TAGGAG   |
| Hk2-reverse (Bisulfite)  | Eurofins | AAACTTATTA<br>ACATTCAAACCC<br>ACACACAAC    |

**Table S1. Primers used in study. Related to Key Resource Table.**
